# Supplementary material
Source: Springer Nature journal article supplement (https://www.springermedizin.de/resource/supplementary/13054_2013_2944_MOESM1_ESM.pdf/9711696)

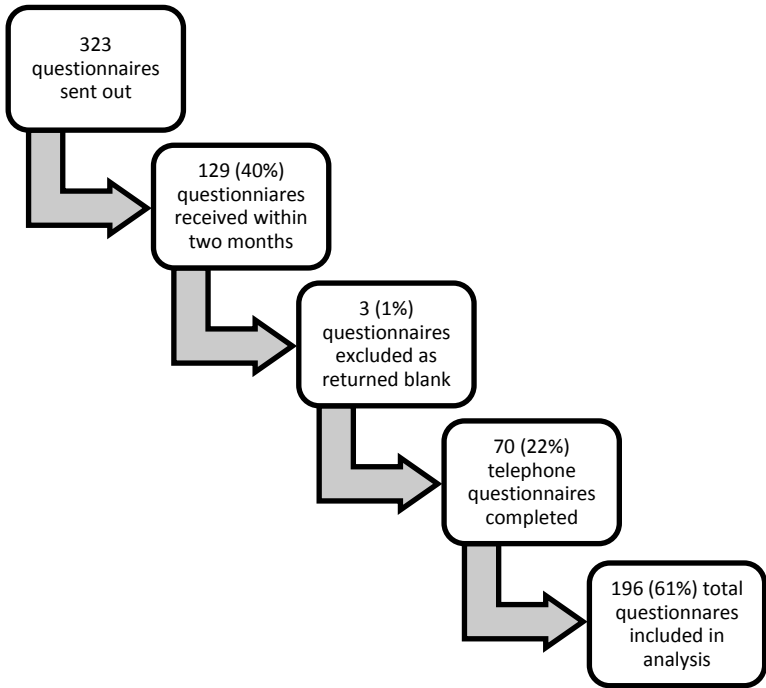

Supplement: MOESM1 [file 9711696]
